# Supplementary material
Source: Springer Nature journal article supplement (https://www.springermedizin.de/resource/supplementary/13102_2009_27_MOESM5_ESM.pdf/9667574)

# GAG-thickness ( $\mu\text{m}$ )

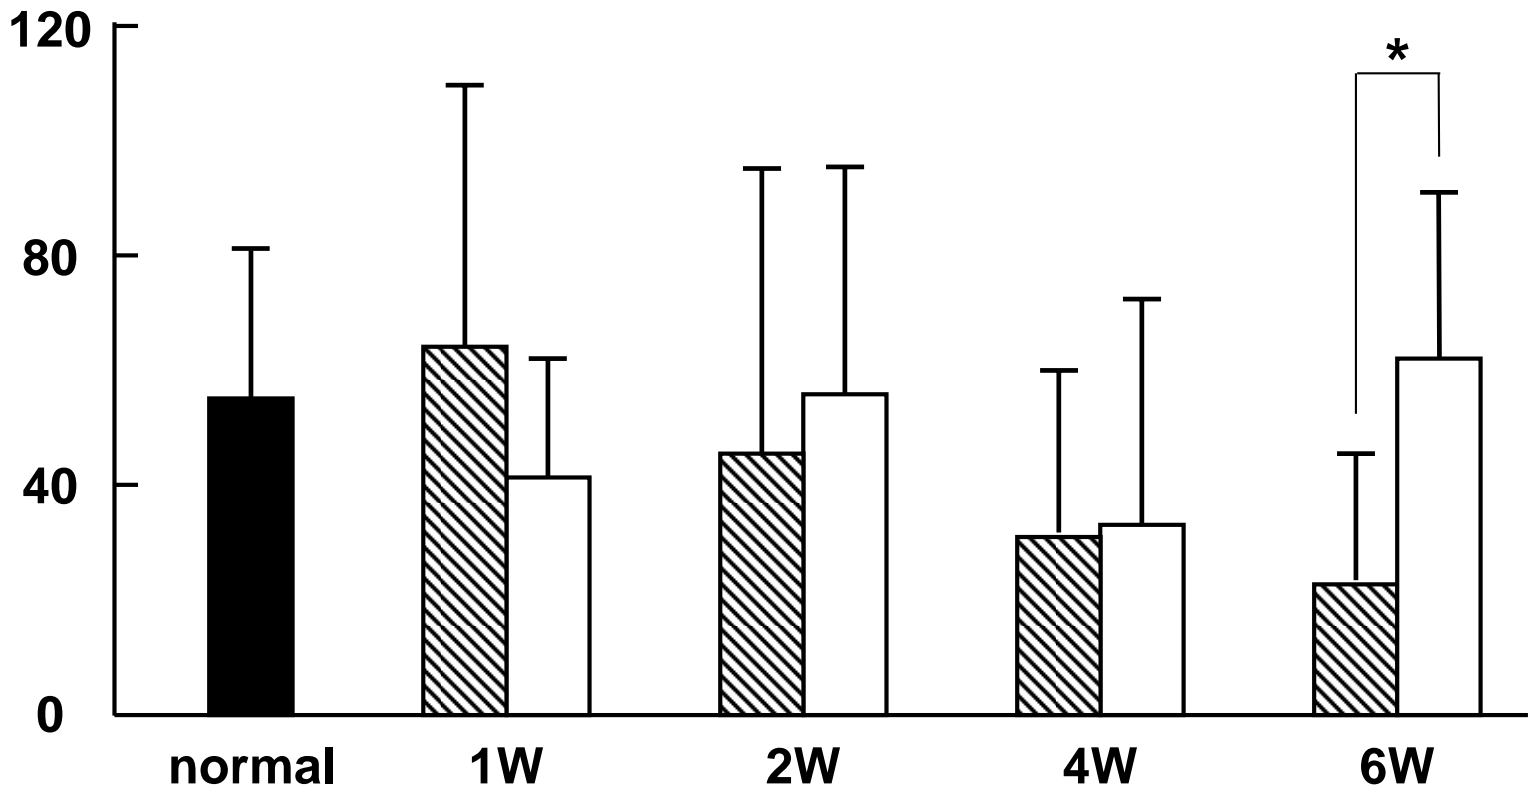

(a)

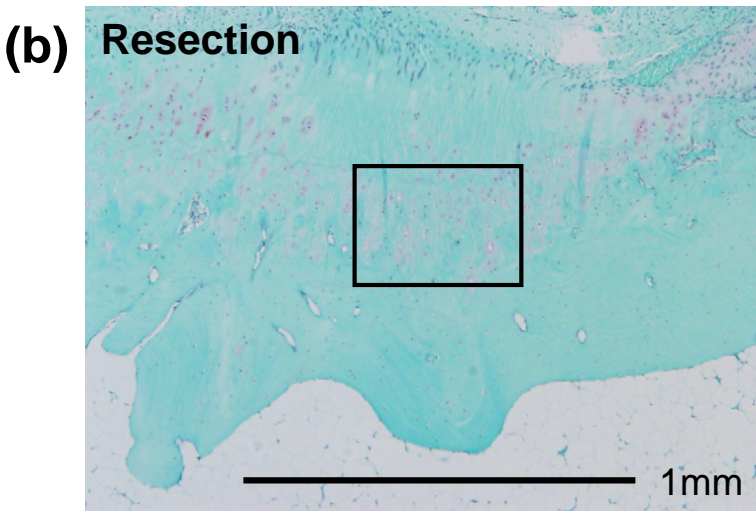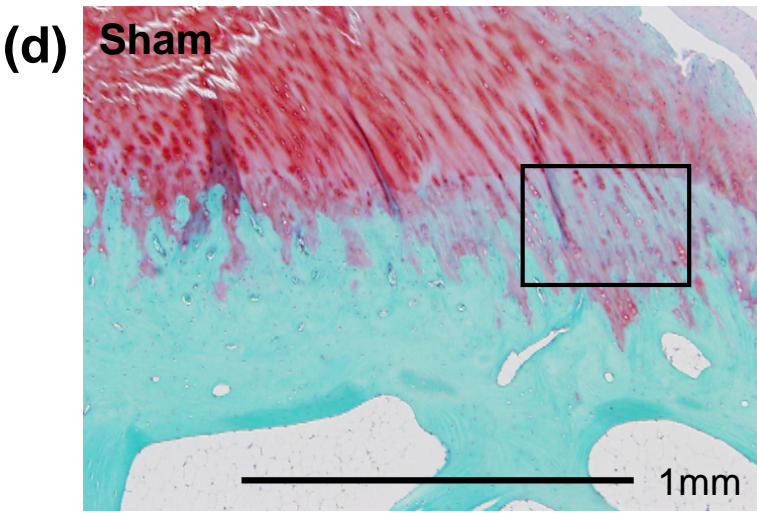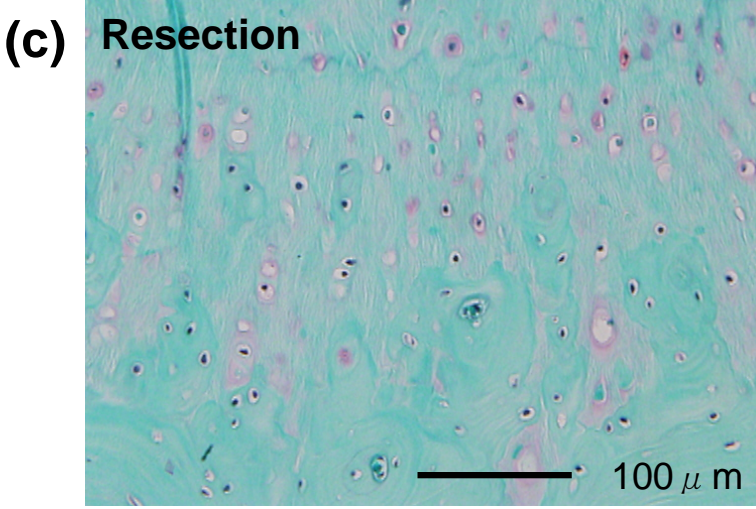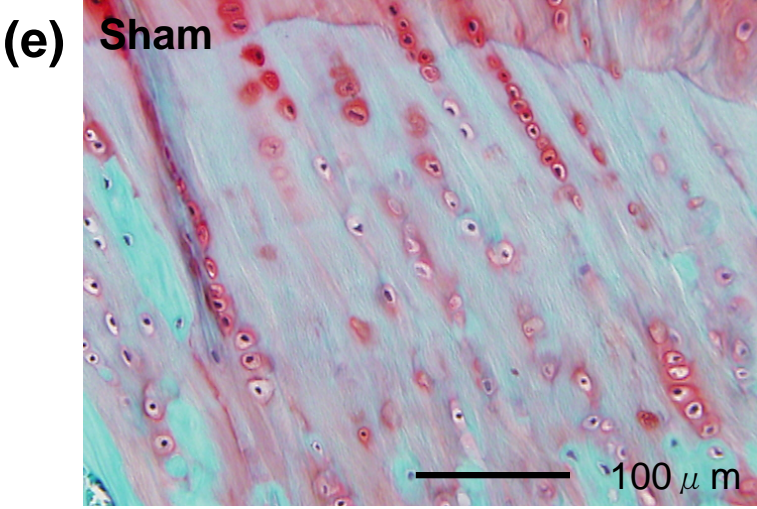

Supplement: MOESM5 [file 9667574]
